# Supplementary material for: A high-response transparent heater based on a CuS nanosheet film with superior mechanical flexibility and chemical stability
Source: Royal Society of Chemistry journal article supplement (doi:10.1039/c7nr09667d), 2018-01-01
Supplement: c7nr09667d1.pdf [file c7nr09667d1.pdf]

## **Electronic Supplementary Information (ESI)**

### **High-response Transparent Heater Based on CuS nanosheets Film with Superior Mechanical Flexibility and Chemical Stability**

Shuyao Xie<sup>a†</sup>, Teng Li<sup>a†</sup>, Zijie Xu<sup>a</sup>, Yanan Wang<sup>a</sup>, Xiangyang Liu<sup>ab</sup>, Wenxi Guo<sup>\*a</sup>

<sup>a</sup> Research Institute for Soft Matter and Biomimetics, Fujian Provincial Key Laboratory for Soft Functional Materials Research, Department of Physics, Xiamen University, Xiamen 361005, China.

<sup>b</sup> Department of Physics, Faculty of Science, National University of Singapore, Singapore, 117542, Singapore

#### **Corresponding Authors**

\*E-mail: wxguo@xmu.edu.cn.

## Supplementary Figures and Videos

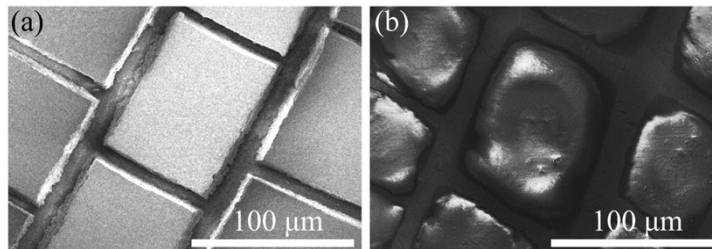

**Fig. S1.** High-resolution SEM images of uniform  $\text{TiO}_2$  template on the PET substrate (a) without and (b) with Cu .

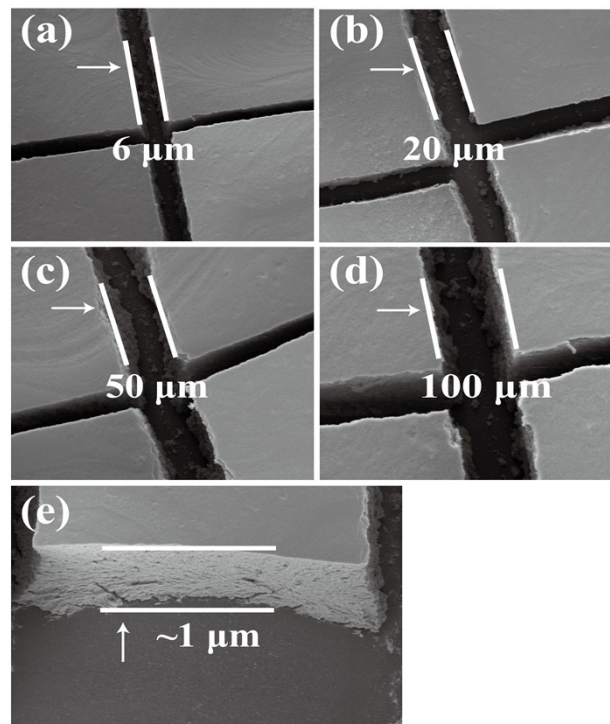

**Fig. S2.** Controllable and large-scale fabrication of flexible transparent conducting films (TCFs). (a-d) The SEM images of the formation crackles with different widths. (e) the SEM image of the thickness of the colloid pattern.

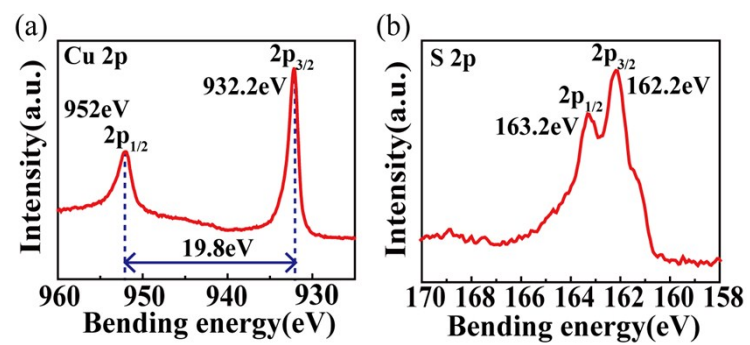

**Fig. S3.** High resolution XPS spectra of Cu 2p (a) and S 2p (b).

**Video S1.** Bending tests for CuS TCFs.
